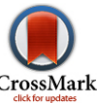

## Correction

# Correction: Spatially-Explicit Estimation of Geographical Representation in Large-Scale Species Distribution Datasets

The *PLOS ONE* Staff

## Notice of Republication

This article was republished on March 19, 2014, because of errors in Figures 3-5. The publisher apologizes for these errors.

## Supporting Information

**File S1.** Originally published, uncorrected article.

**File S2.** Republished corrected article.

## Reference

1. Kalwij JM, Robertson MP, Ronk A, Zobel M, Pärtel M (2014) Spatially-Explicit Estimation of Geographical Representation in Large-Scale Species Distribution Datasets. *PLoS ONE* 9(1): e85306. doi:10.1371/journal.pone.0085306

**Citation:** The *PLOS ONE* Staff (2014) Correction: Spatially-Explicit Estimation of Geographical Representation in Large-Scale Species Distribution Datasets. *PLoS ONE* 9(4): e95065. doi:10.1371/journal.pone.0095065

**Published:** April 7, 2014

**Copyright:** © 2014 The *PLOS ONE* Staff. This is an open-access article distributed under the terms of the Creative Commons Attribution License, which permits unrestricted use, distribution, and reproduction in any medium, provided the original author and source are credited.
